# Supplementary material for: Drosophila Sirtuin 6 mediates developmental diet‐dependent programming of adult physiology and survival
Source: PubMed Central journal article supplement (PMC8920434; doi:10.1111/acel.13576), 2022-03-02
Supplement: ACEL-21-e13576-s001.pdf [file ACEL-21-e13576-s001.pdf]

1 **Supporting Information**

2 **Experimental Procedures:**

3 **Primer Sequences used in this paper**

| Gene Name            | Forward Primer              | Reverse Primer            |
|----------------------|-----------------------------|---------------------------|
| <i>rp49</i>          | AGTATCTGATGCCCAACATC        | ACAATCTCCTTGCGCTTC        |
| <i>Sirt6</i>         | TCGGGACACGTTGTCCTCCAC       | TCTGGCTTCATCGAAGGAAACAT   |
| <i>Spargel</i>       | CATTACCATGGCCAAGAACAAGGTGC  | CGGGTGGAGTTTGTGCTGAGTGGC  |
| <i>TFAM</i>          | CCAGCATCAGCAACTCC           | GGCATCGGACCAGTTCTTAG      |
| <i>Delg</i>          | CAAGTTTAAGCGAGAACAATACGCCTG | TACATTCTTTTAGCAGCTGGAGGTG |
| <i>Cox4</i>          | GGCGTTTCACTCCTCTCTG         | CTGTTGTTCTCGTAGTCCCCTTG   |
| <i>Eip74EF</i>       | GCGAATACTGTCCGCTTTC         | GATGTCCTTGGGCACATCCA      |
| <i>Eip75B</i>        | GCGGTCCAGAATCAGCAG          | GAGGATGTGGAGGAGGATGA      |
| <i>BR-C</i>          | AACACCCGGTCATACTGCTG        | ATGGCTGTGTGTGTCCTCTG      |
| <i>EcR</i>           | ATTTGGTGCTTGTGCCGAAC        | AAGGATCATAGCTTCCGGCG      |
| <i>Ultraspiracle</i> | CAGTATCCGCCTAACCATCC        | TTCCTCTGCCGCTTGTCTAT      |
| <i>Kr-h1</i>         | CCGAATACGACATAACAGCC        | CCCATTTCCTGGAATATGT       |
| <i>dilp2</i>         | AGCAAGCCTTTGTCCTTCATCTC     | ACACCATACTCAGCACCTCGTTG   |
| <i>dilp5</i>         | GAGGCACCTTGGGCCTATTC        | CATCTGGTGAGATTCGGAGC      |
| <i>Sir2</i>          | TATATCCCGGCGAGTTTCAG        | GAGGCCGTTGAAAAGGAGCCG     |
| <i>Sirt4</i>         | TGTCCAAACCGAATGTTTTGGTTC    | GTTCTGGCCAGTACCGCTT       |
| <i>Sirt7</i>         | ACGTGGCGCAGTCTTACATAA       | TTCGATCTTCCGTCGTGCG       |
| <i>InR</i>           | ACGATGTAGAGGGCAGTGTA        | TACCACGAAGATAGCGTAGC      |
| <i>GSK</i>           | ATATACAGATCTTTTGTGGCAA      | AGGAGGAAGTTCTTGGACGA      |
| <i>AKT</i>           | TCTCCGTACAGGGAACGACT        | TGGACTTGAGCACACGACTC      |
| <i>Raptor</i>        | GCGACTGTTTGACAAGCGTT        | CGTCCCACTCGTACACAACA      |
| <i>Rheb</i>          | CGACGTAATGGGCAAGAAAT        | CAAGACAACCGCTCTTCTCC      |
| <i>4eBP</i>          | CCAGGAAGGTTGTCATCTCG        | GTTGGACGGCGGAGTTTG        |
| <i>GLUT1</i>         | GGATTGGCCTCAGGTCTCAC        | GCGAAAATGGATACCGCCAC      |
| <i>HexA</i>          | GTAACGTATGTGCAGGATCT        | ATCATAATGTGCTGCGGTAT      |
| <i>PEPCK</i>         | CATTGCGTGGATGAAGTTTG        | ATGCCCTCCAGAACACAC        |
| <i>FBPase</i>        | TCATCAACATGCTGAAGTCA        | CGATGTATTTGCCCTGTTTC      |
| <i>LDH</i>           | GTGTGACATCCGTGGTCAAG        | CTACGATCCGTGGCATCTTT      |
| <i>PFK</i>           | CTGCAGCAGGATGTCTACCA        | GTCGATGTTGCGCTTGATCT      |
| <i>PDK1</i>          | GGTCGTTACATAGGCGAGGG        | AAAGAGAACGCTGGTCCTGG      |
| <i>Tpi</i>           | GACTGGAAGAACGTGGTGGT        | CGTTGATGATGTCCACGAAC      |
| <i>Mondo</i>         | GCGGCGTTACAACATAAAGA        | CTCCATGCGCAAAGCTTCAA      |
| <i>HIF1a</i>         | CCAAAGGAGAAAAGAAGGAAC       | GAATCTTGAGGAAAGCGATG      |
| <i>SREBP</i>         | TGGCTTCTACCAAGTGCCAG        | CAAGAGCTGTTGCGTTGGAC      |
| <i>Brummer</i>       | TCCCGAGTTTCTGTCCAAGT        | GCGTCCTTCTGTGCTTCTT       |
| <i>Lipase</i>        | GATTTGGGCATAGAGATGTG        | CTCATAGGATTACGGAGAG       |
| <i>Trehalase</i>     | TATCGGCTTCGGTTATGG          | CGGGAGTGTTGAGTTGTTT       |
| <i>ACC</i>           | CATTGTTAGTGTGTGGCTGTGA      | CTTATCTCTGGCTCTGAACG      |
| <i>DAG</i>           | ATCTCCCTTAGCCTGTTTAG        | TAACGAAGGTCGCCATAAG       |
| <i>MCAD</i>          | CAACCACATTCTGTCTGA          | TCTTCTGTTCTTGTACCG        |

|                     |                       |                      |
|---------------------|-----------------------|----------------------|
| <i>FAS</i>          | CGGAGAAGAGTTACATCCTG  | CAATCACCACCTTTACGC   |
| <i>Cpt1</i>         | AGGAACTGCAGCCTATCATGG | GGAGTTGCTTTGCCCTTCAG |
| <i>SCD1</i>         | TTTCTTCGCCAAGATCGGCT  | CAATCTCCTCCTGGGCTGG  |
| <i>DGAT</i>         | ACTGCTCTGCATTGGAGGTC  | ATGTCCTTCGCCTTCGTTGT |
| <i>Thiolase</i>     | GAAGAACAGCCAGAATATCG  | CACGATGTAGTCGATGAGC  |
| <i>MnSOD</i>        | AGGCCAAGTCGAAGAGCGA   | ACGGTCAGCGTGGTCAGCTC |
| <i>Catalase</i>     | GACGATGTACATTCAGGTCA  | CACCTCAGCAAAGTAGTTCT |
| <i>Thioredoxin1</i> | GGTGCGTTCTATTGTGCT    | ACGGTGTCGTAAACATCCT  |
| <i>GSTD2q</i>       | TACGGCAAGGATGACTATCT  | CAGGAAGGTGTCGAGAAAT  |

4

5

6

7

8

9

10

11

12

13

14

15

16

17

18

19

20

21

22

23 **Supplementary Figures and Legends:**

24 **Supplementary Figure 1:**

25 (A) Protein sequence alignment of *SIRT6* from *Drosophila*, mouse and human (uniprot.org)  
26 using ClustalW, indicating conserved active site residues, NAD<sup>+</sup> binding and catalytic domain.  
27 (B) Schematic representation of chromosomal position indicating site of CRISPR mediated  
28 deletion of *Sirt6* and insertion of knock-in cassette containing STOP codons and RFP. (C)  
29 Genome sequence pre- and post CRISPR mediation deletion-insertion, as indicated. Primers  
30 used for confirmation are highlighted in yellow. (D) PCR based confirmation of STOP-RFP  
31 cassette insertion in *Sirt6*<sup>-/-bck-L1/L2</sup> flies. L1 and L2 indicate two independently generated fly  
32 lines (male-M and female-F) were confirmed for *Sirt6* deletion. (E) Quantitative PCR showing  
33 absence of *Sirt6* mRNA in CRISPR mutants of *Sirt6* relative to *w*<sup>1118</sup> controls. (F) Larval weights  
34 at 24, 48 and 72 hours post synchronised egg laying of *w*<sup>1118</sup> and *Sirt6*<sup>-/-bck-L1</sup> flies (N=3, n=30-  
35 40 per genotype). (G) Quantitative PCR to confirm over-expression of *Sirt6* mRNA from *Sirt6*<sup>OE</sup>  
36 transgenic flies (*actingal4>Sirt6*<sup>OE</sup>) relative to control (*actingal4>w*<sup>1118</sup>). (H) Larval body size at  
37 24, 48 and 72 hours post synchronised egg laying in *actingal4>w*<sup>1118</sup> and transgenic *Sirt6* over-  
38 expressing flies. (I) Percentage pupation in control and *Sirt6* over-expressing transgenic flies  
39 (N=3, n=150-200). (J) Body weight in control and *Sirt6* over-expressing transgenic flies (N=3,  
40 n=20-25 per genotype). (K-L) Relative wing dimensions (K) and wing aspect ratio (L) in control  
41 and *Sirt6* over-expressing transgenic flies (N=3, n=20-25). (M) Quantitative PCR showing *UAS*-  
42 *Sirt6* (*Sirt6*<sup>OE</sup>) mediated rescue of *Sirt6* mRNA expression in *Sirt6*<sup>-/-bck-1</sup> flies. Relative changes  
43 in *Sirt6* expression are computed with respect to control *UAS-Sirt6* (*Sirt6*<sup>OE</sup>) flies. All data  
44 presented is mean ± s.e.m. (N=3, n=3). Asterisk depicts p values (\*p<0.05, \*\*p<0.01 and  
45 \*\*\*p<0.001) as observed by Student's t-test.

46 **Supplementary Figure 2:**

47 (A) Relative change in *Sirt6* mRNA expression (black dashed line) and NAD<sup>+</sup> levels (green) in  
48 *w*<sup>1118</sup> larvae during development, as indicated. (B) Relative expression of genes in *Sirt6*<sup>-/-bck-L1</sup>  
49 larvae compared to *w*<sup>1118</sup> (black dashed line) during the time course of larval development.  
50 Asterisk depicts comparison with *w*<sup>1118</sup> at 24 hours and hashtags depict comparison of the  
51 *Sirt6*<sup>-/-bck-L1</sup> to *w*<sup>1118</sup>, at the respective time points, as indicated. All data presented is mean ±  
52 s.e.m. (N=3, n=3). (C) Relative change in expression of *dilp2* and *dilp5* in transgenic rescue of

53 Sirt6 larvae at 24, 48 and 72 hours post egg laying (N=3, n=3 with 10-20 larvae per n). Asterisk  
54 and hashtags depict p values (\*, #p<0.05, \*\*, ##p<0.01 and \*\*\*, ###p<0.001) as observed by  
55 Student's t-test and Two-way ANOVA, as applicable.

### 56 **Supplementary Figure 3:**

57 (A) Starvation survival in 3-5 day old *w<sup>1118</sup>* and *Sirt6<sup>-/-bck-L1/L2</sup>* flies (N=3, n=6 with 10 flies per  
58 n). (B) Oxidative stress survival on 20mM Paraquat in *w<sup>1118</sup>* (control) and *Sirt6<sup>-/-bck-L1</sup>* flies (N=3,  
59 n=6 with 10 flies per n). (C) Relative mRNA levels of genes involved in mitochondrial  
60 biogenesis *w<sup>1118</sup>* and *Sirt6<sup>-/-bck-L1/L2</sup>* flies (N=3, n=3 with 8 flies per n). (D) Representative blots  
61 and quantification (right) for change in levels of mitochondrial proteins in *w<sup>1118</sup>* and *Sirt6<sup>-/-bck-</sup>*  
62 *L1/L2* flies (N=3, n=3 with 8 flies per n). (E) Mitochondrial DNA content (normalised to nuclear  
63 DNA) in 35-37 day old *w<sup>1118</sup>* (control) and *Sirt6<sup>-/-bck-L1/L2</sup>* flies (N=2, n=3 with 30 flies per n). (F)  
64 Mitochondrial DNA content (normalised to nuclear DNA) in transgenic rescue of *Sirt6* in 35-  
65 37 days old flies. (G) Average number of eggs laid per fly over a period of 20 days from a  
66 heterogeneous cross, parents as indicated (N=5, n=10). All data presented is mean ± s.e.m.  
67 Asterisk depict p values (\*, #p<0.05, \*\*, ##p<0.01 and \*\*\*, ###p<0.001) as observed by Student's  
68 t-test and Two-way ANOVA, as applicable.

### 69 **Supplementary Figure 4:**

70 (A-B) Weight gain and pupation onset (marked in black) in *w<sup>1118</sup>* larvae reared on differential  
71 concentration of yeast (A) and glucose (B) diets, as indicated (N=3, n=20-25). (C) Weight gain  
72 and pupation onset (marked in black) in *w<sup>1118</sup>* and *Sirt6<sup>-/-bck-L1</sup>* larvae reared on differential  
73 concentration of glucose diets, as indicated (N=3, n=20-25). (D) Body weight measurement in  
74 *w<sup>1118</sup>* and *Sirt6<sup>-/-bck-L1</sup>* 3-5 day old flies (N=3, n=20-25 per genotype), reared on differential  
75 concentration of glucose diets, as indicated. (E) Median survival under starvation in *w<sup>1118</sup>* and  
76 *Sirt6<sup>-/-bck-L1</sup>* flies reared on differential concentrations of yeast and glucose diets, from three  
77 independent experiments (N=3, n=8 with 10 flies per n). (F) Median survival under oxidative  
78 stress in *w<sup>1118</sup>* and *Sirt6<sup>-/-bck-L1</sup>* flies reared on differential concentrations of yeast and glucose  
79 diets, from three independent experiments (N=3, n=8 with 10 flies per n). All data presented  
80 is mean ± s.e.m. Student's t-test and Two-way ANOVA were used to analyse statistical  
81 significance of the data (\*p<0.05, \*\*p<0.01 and \*\*\*p<0.001).

82



83 **Supplementary Figure 5:**

84 (A-B) Life spans of  $w^{1118}$  (A) and  $Sirt6^{-/-bck-1}$  (B) flies on normal diet, which were reared on  
85 differential yeast diets during larval development (n = 10 with 10 flies per n). (C-D) Life spans  
86 of  $w^{1118}$  (C) and  $Sirt6^{-/-bck-1}$  (D) flies on normal diet, which were reared on differential glucose  
87 diets during larval development (n = 10 with 10 flies per n). (E) Median life spans of  $w^{1118}$  and  
88  $Sirt6^{-/-bck-1}$  reared on differential yeast and glucose diets (N=3, n = 10 with 10 flies per n). Log-  
89 rank (Mantel-Cox) test was used to plot survival curves and statistical analysis. Asterisks  
90 indicate comparison with  $w^{1118}$  grown on ND and hashtag indicates comparison among  $w^{1118}$   
91 and  $Sirt6^{-/-bck-1}$  for the particular diet. All data presented is mean  $\pm$  s.e.m. Two-way ANOVA  
92 was used to analyse statistical significance of the data (\*, #p<0.05, \*\*, ##p<0.01 and \*\*\*,  
93 ###p<0.001).

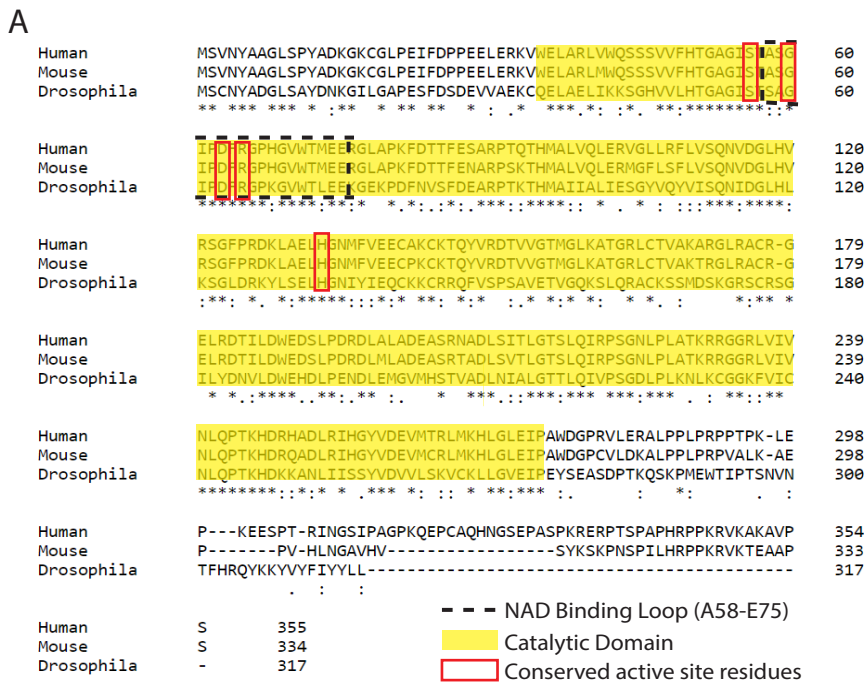

**C**

Product length pre-deletion: 279bp

CTCGATGGACTCAITTAGCCGTAACAAATATAAACA...TTATACCAAAAAGACATAATAGTCGCTTTTGA  
AGTAGATCAAAAC/TTTTATCAAAACATGAGCTGCACTACG/CGAAAGATTGTCAGCAGCAAGCA  
GGGAAT/TTTGGAAGCACCAGAGATTTGCAGCGCATGAGGTTGTGGCCGAAAAGTCAGGAATTTG  
GCTGAATGATCAAGAAATCGGGACACGTTGTCTCCACCGGAGCTGGGAATAGTACGTCTCAGGA  
ATTC

Product length post crisper deletion and insertion: 2083kb, 631bp for internal RFP primer

CTCGATGGACTCAITTAGCCGTAACAAATATAAACA...TTATACCAAAAAGACATAATAGTCGCTTTTGA  
AGTAGATCAAAACtctagaTAATGATTAGTGAATAAagatctATAACTCGTATAATGATGCTATACCAA  
GTTAAGttaccGGATCAATTAATAGAGACTAATTAATAGAGACTAATTAATAGGATCCAAGCTTAT  
CGATTTCGAACCTTCGACCGCGGATATAAATAGAGCGCTTCGCTACGGGGGCCAAATCAATTCAA  
ACAAGAAAGTGAACACGCTGCTAAGCAAAGTCAAGAAATAAACAAGCGGCAGCTGAACAGCTAAA  
CAATCGGcgcgcacactagacgtgacacacATGAGGCTTCTCAAGAATGTTATCAAGGAGTTATGAGGTT  
AAGTTTCGATGGAAGACCGCTAATGGCCAGGTTGTAATAAGAGCGGAAAGGAGGGGAGCG  
CATACGAAGGCCAACAATCGTAAGCTTAAAGTAAACCAAGGGGGACCTTTCGATTTGCGGATA  
TTTTGCACCAATAATCAGATGGAGACAGGTTATATGTAAACACCTGCCGACATACAGAGATATAA  
AAGCTGCTATTCTCGAAGTATTAATGGGAAAGGGTCATGAAGCTTGAAGAGGTTGGGCGGCTTAC  
TGTAACCCAGGATTCAGTTTCAGGATGGCTTTCATCTCAAGGTCAAGTTCATGGCGTAACTTC  
CTTCGGATGGACCTTATTCAAAAGAAAGCAATGGCGTGGGAGCCAGCACTAGGCTTGATCTCCTC  
GTGATGGCGTGTGAAGGAGGAGATTATAAGGCTGTGAAGCTGAAGAGCGGTGCATTAAGTTG  
AATTCAAAAGTATTACATGGCAAAGACCTGTGCAAGCTACAGGGTACTACTATTTGACTCCAACT  
GGATAACAACCAACGAAGCACTATACACTGTTGAGCAGTATGAAGAACCGGAGGAGCCCACT  
TCTGTCTCTTAGggccatcgcaattcagctcccCTAAGCGTCCGCGCCTCAAGCTGATGGGAGCGTC  
ATTGTTGGGGGGTAAACGTGAAATCAGTGTATTCAGCTTCAATCGCAACAAAAAATCACTGCAACA  
CTGAAAAGCATACGAAGCATGAAATTTGACAGAGAACCATAAAGTATTTATCGCAAAAGACAGCT  
ATAGCAGAAAAGCAAATTAATTCGGCATAGTTGTACACAAAGATAAATCGCCAGATTCAGTG  
TTGCAGAAATAAGAAACCCCATGTGTTCCTTTTCCTTTTCCTCCAGCAGATCATTTCGTTG  
GTGAAAGAACGGGTCATTCCAGCAGGATTCGACTCGGGGAAGCAGAGCTCGCGTCACTTCTGCTAT  
AATTAGCCTTTCATTTCACCAGTTCGGCGCTGCTGCGCTTTCGGCGCTGTTTGTGGCAAGTGT  
AGCAGCAGGCTGTGCAGCGAGTGTGGCATGCATTCGGCTTCCACCGTGGTATGCTTCTGGGACGA  
TGAGTCTTCCTTTGGGGCCACAGCATAATCGTTCAGCTACCGAAATGGTACTTCACTTCATTAACT  
GCCGTCAGCAGTGGGATTGACATACATCATTATATATACATCATTATGTGACTATGTAAGTGCG  
ATATAAGCAATCAACCAAGCAAAATGTGTGCTGTGCTGTTACAGGAAGCAATCATTATAGTAATTCG  
TTGATAAAGTAATTATGATGATGAAGCCCAATCAATCGAAACAAATAGGCAAAACCATCGGAAG  
TctcgagATAACTCGTATAATGATGCTATACGAAGTTAgetagTTGGGAGCACCAGAGAGTTTCGACA  
CGGATGAGGTTGTGGCCAAAAGTCCAGGAATTTGGCTGAATGATCAAGAAATCGGGACACGTTGTCC  
TCCACCGGAGCTGGGATCAGTACGTCTCAGGAATTC

STOP Codons  
 LoXP Sites  
 3x P3 Promoter  
 RFP  
 Tubulin 3'UTR

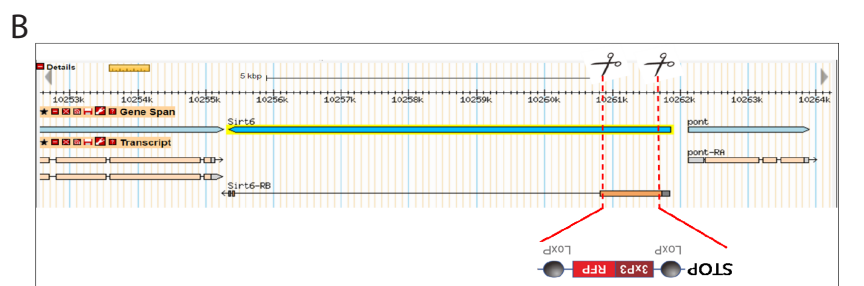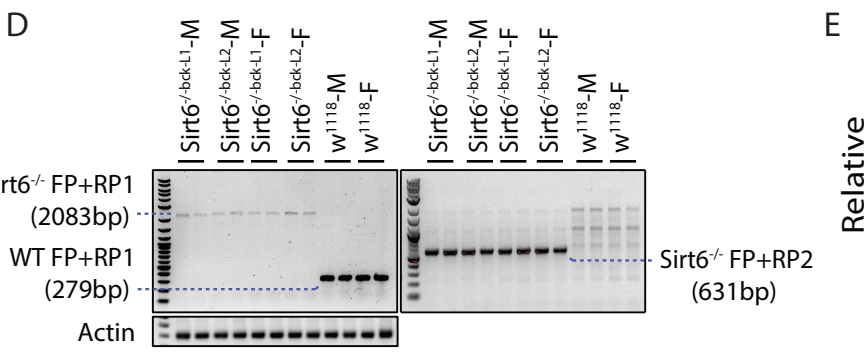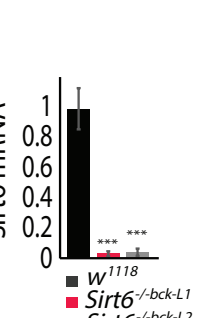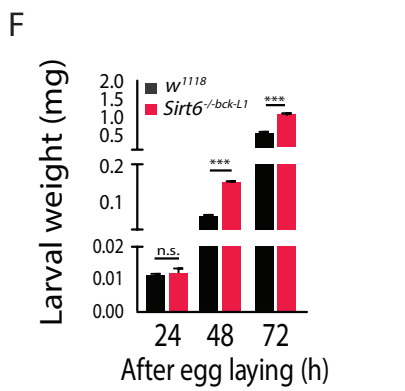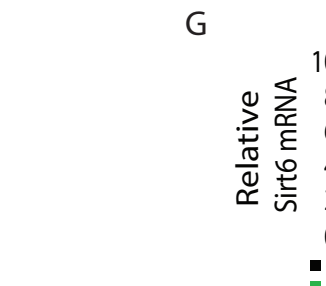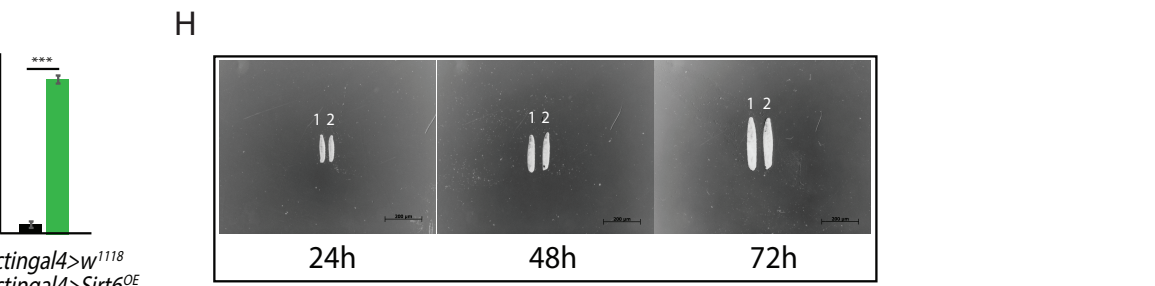

Supplementary figure 1

Contd.

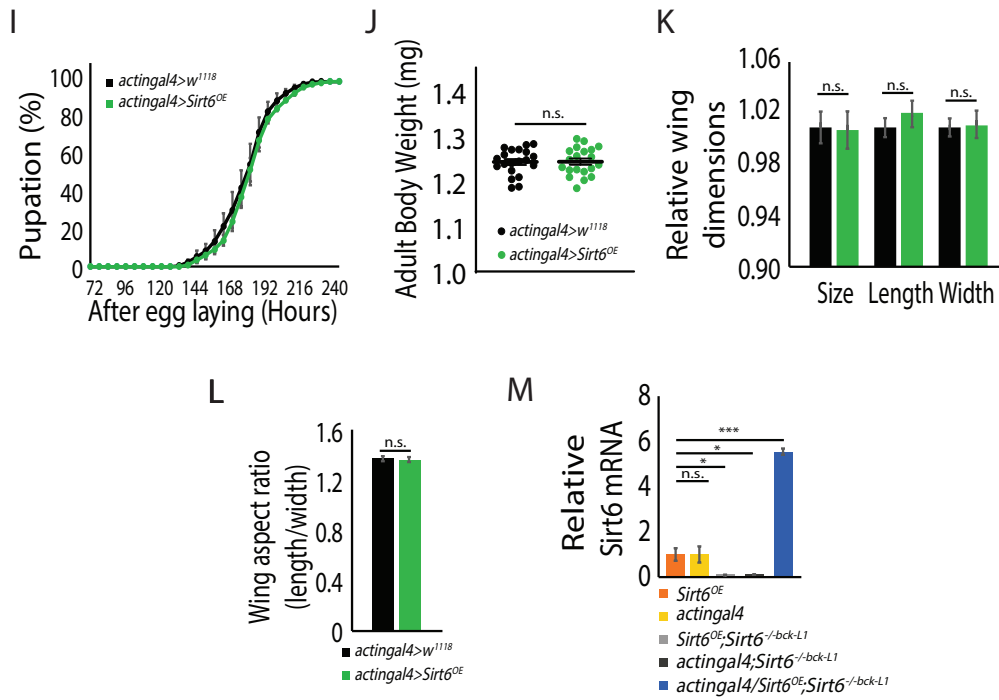

Supplementary figure 1

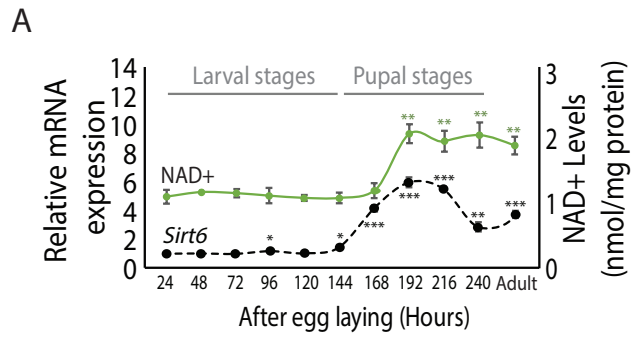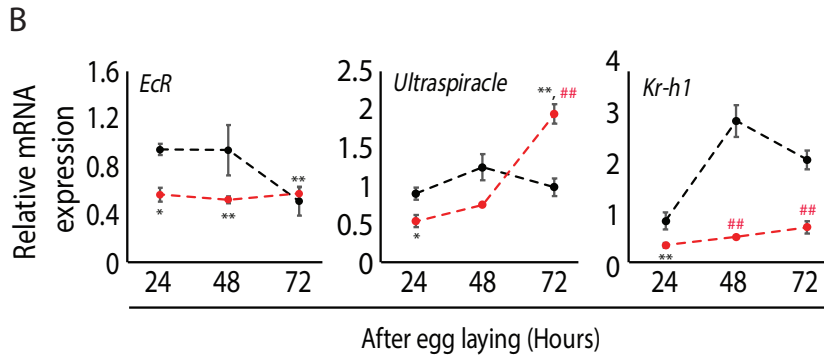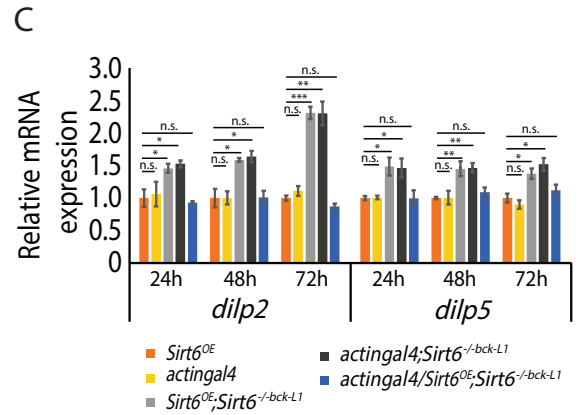

Supplementary figure 2

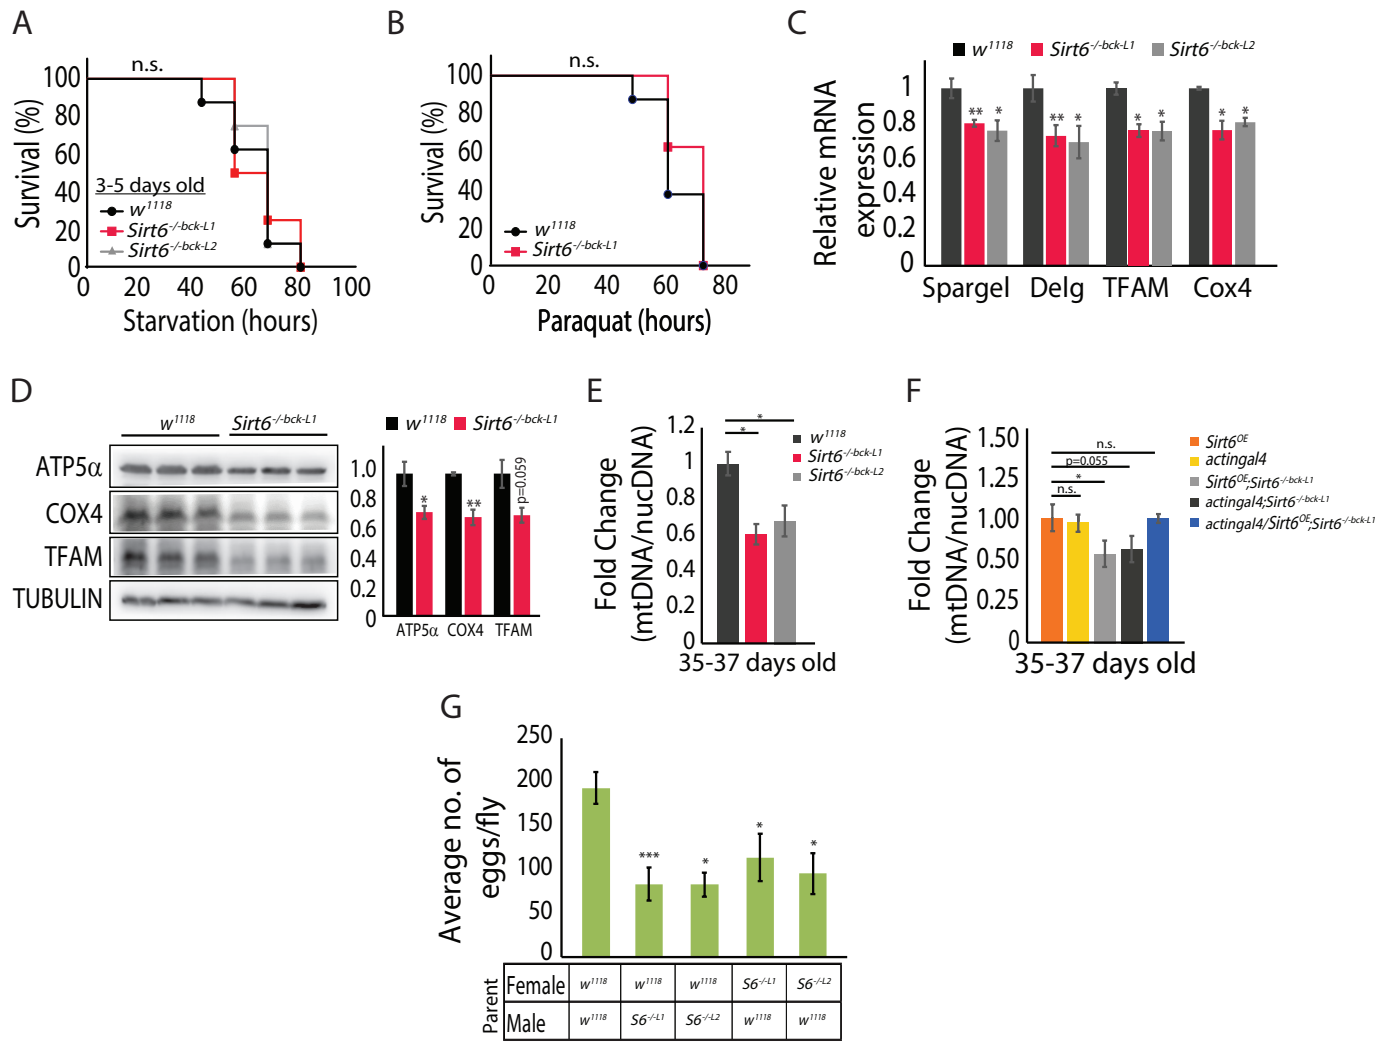

Supplementary figure 3

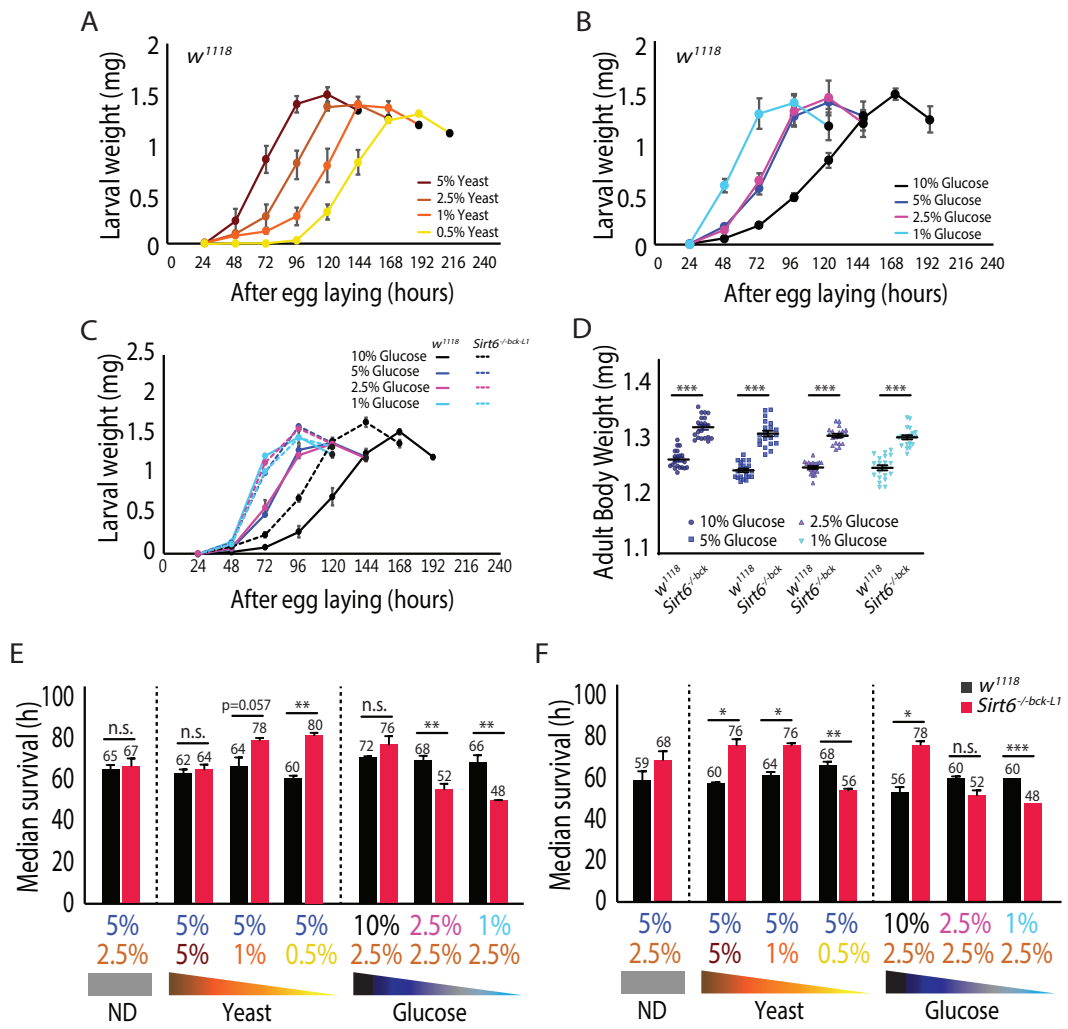

Supplementary figure 4

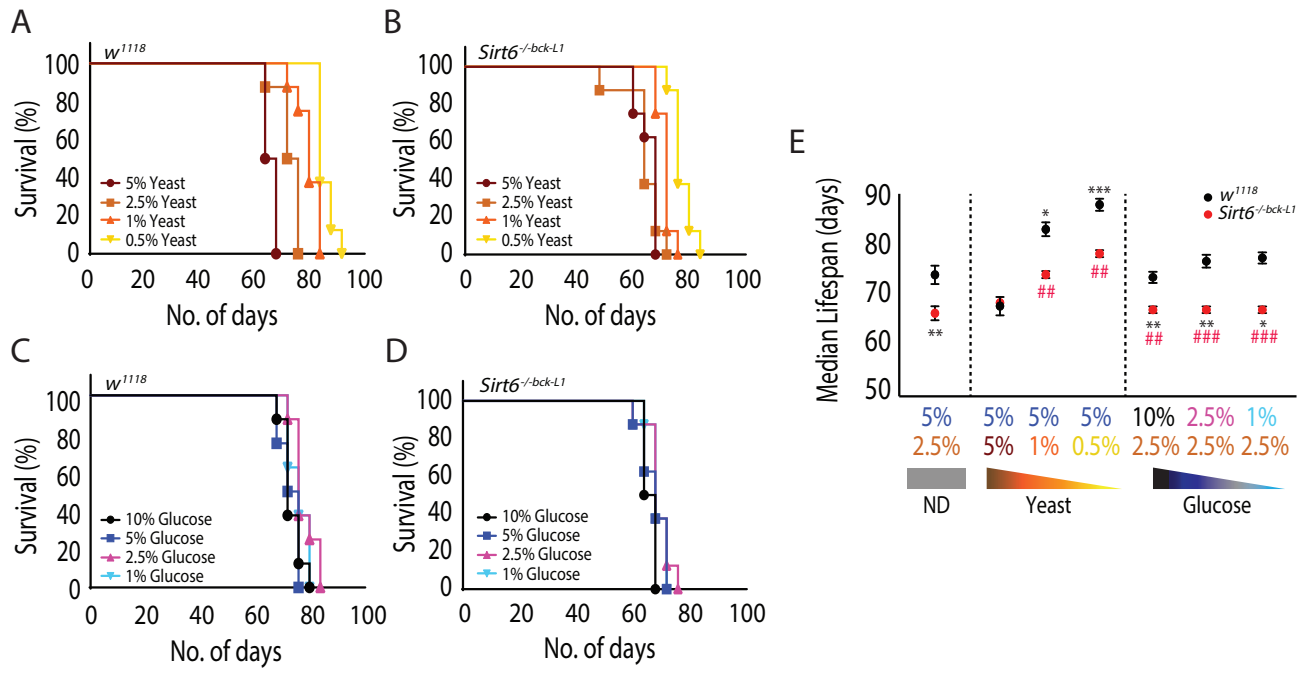

Supplementary Figure 5
